# Supplementary material
Source: publisher site journal article supplement (https://www.dovepress.com/article/588333)
Supplement: Supplementary file 1 [file 588333%20Supplementary%20Material.docx]

## ***Supplementary material***

**Table S1**. Deterministic sensitivity analysis parameter ranges

| **Parameter** | **Base case value** | **Low value** | **High value** |
| --- | --- | --- | --- |
| Vaccine coverage rates low risk population | 46.85% | 37.5% | 56.2% |
| Vaccine coverage rates high risk population | 57.95% | 46.4% | 69.5% |
| Relative efficacy of TIV-HD vs. TIV-SD | 24.2% | 9.7% | 36.5% |
| Discount rate outcomes | 3% | 0% | 6% |
| Excess mortality due to influenza | 108.14 | 86.51 | 129.77 |
| Vaccine efficacy against influenza (TIV-SD) | 46.0% | 39.0% | 65.0% |
| Hospitalization rate | 7,839.7 | 6,271.8 | 9,407.6 |
| Adjustment factor to influenza season | 60% | 48,0% | 72,0% |
| Cost of influenza-related hospitalization with complications | 5,237.41 € | 4,189.93 € | 6,284.89 € |
| Efficacy against influenza-associated hospitalization for TIV-SD vs. no vaccine | 28.0% | 13.4% | 39.1% |

**Notes:**

**Abbreviations:** TIV-HD, high-dose trivalent influenza vaccine; TIV-SD, standard-dose trivalent influenza vaccine
